# Supplementary material
Source: PubMed Central journal article supplement (PMC7860052)
Supplement: NIHMS1618280-supplement-1.pdf [file NIHMS1618280-supplement-1.pdf]

# Individual Variation of Human Cortical Structure Is Established in the First Year of Life

## *Supplement 1*

### Supplemental Methods

#### Image Acquisition

Proton density and T2 weighted structural images for neonates were acquired on the Allegra using a turbo-spin echo sequence (TSE, TR = 6200ms, TE1 = 20ms, TE2 = 119ms, flip angle = 150°, spatial resolution = 1.25mm x 1.25mm x 1.95mm, N = 166) or a “fast” turbo-spin echo sequence using a decreased TR, a smaller image matrix, and fewer slices (TSE, TR range = 5270ms-5690ms, TE1 range = 20ms-21ms, TE2 range = 119ms-124ms, flip angle = 150°, spatial resolution = 1.25mm x 1.25mm x 1.95mm, N = 189). For the Trio, participants were initially scanned using a TSE protocol (TR=6200ms, TE1=17, TE2=116ms, flip angle=150°, spatial resolution= 1.25mm x 1.25mm x 1.95 mm, N = 4) while the remainder were scanned using a 3DT2 SPACE protocol (TR=3200ms, TE=406, flip angle=120°, spatial resolution= 1mm x 1mm x 1mm, N=58).

T1 weighted images for neonates, 1, 2, 4 and 6 year olds were acquired on the Allegra using a 3D magnetization prepared rapid gradient echo sequence (MP-RAGE TR = 1880-1900ms, TE = 4.38ms, flip angle = 7°, spatial resolution = 1mm x 1mm x 1mm). T1 images on the Trio were collected using a lower echo time (MP-RAGE TR = 1860-1900ms, TE = 3.74ms, flip angle = 7°, spatial resolution = 1mm x 1mm x 1mm).

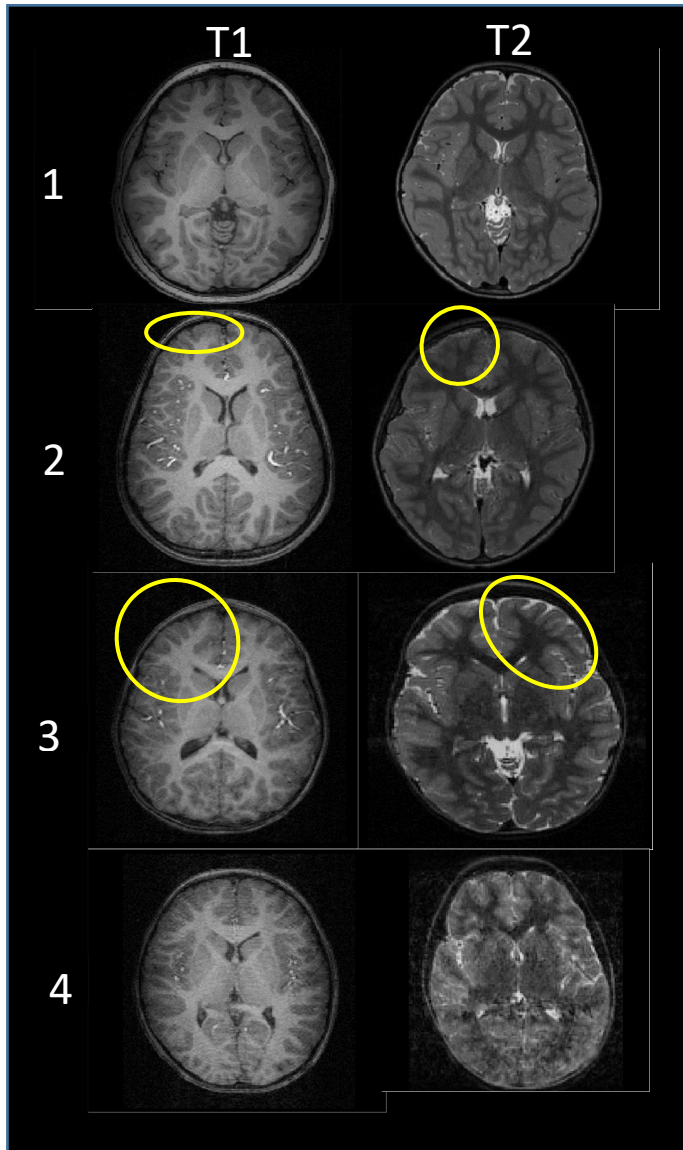

**Supplemental Figure S1. Examples of motion scoring.** T1 and T2 weighted images were rated for motion artifacts on a scale of 1 to 4, with 1 being the highest quality images with no to slight artifacts in a few slices and 4 being the lowest quality images with moderate to heavy artifacts in few to many slices. Images were rated by two raters with average inter-rater reliability = 97.5% and average intra-rater reliability = 87%. Rater scores were averaged. If scores differed by two or more points, raters met and a consensus score was generated.

|        | N           |             | Motion Score |             |             |
|--------|-------------|-------------|--------------|-------------|-------------|
|        | WM/GM (S/T) | CT/SA (S/T) | N (S/T)      | Singleton   | Twin        |
|        |             |             |              | Mean (SD)   | Mean (SD)   |
| Neo    | 181/157     | -           | 181/157      | 2.85 (0.68) | 2.66 (0.55) |
| Year 1 | 111/108     | 110/106     | 111/109      | 2.36 (0.65) | 2.48 (0.56) |
| Year 2 | 70/80       | 70/79       | 70/80        | 2.29 (0.54) | 2.17 (0.55) |
| Year 4 | 90/56       | 85/55       | 92/56        | 2.59 (0.95) | 2.48 (0.93) |
| Year 6 | 90/56       | 88/55       | 90/56        | 2.29 (0.83) | 2.28 (0.83) |

**Supplemental Table S1.** Scan sample size and motion scores for singleton (S) and twin (T) cohorts

|         | Neonate  | Year 1 | Year 2 | Year 4   | Year 6 |
|---------|----------|--------|--------|----------|--------|
| Neonate |          |        |        |          |        |
| Year 1  | 5.94E-08 |        |        |          |        |
| Year 2  | 4.16E-08 | 0.41   |        |          |        |
| Year 4  | 4.15E-03 | 0.03   | 0.01   |          |        |
| Year 6  | 1.46E-09 | 0.33   | 0.93   | 3.17E-03 |        |

**Supplemental Table S2.** Singleton cohort pairwise t-test comparison P-value for motion scores. Overall ANOVA: Chi-square statistic – 61.81, DF – 4, P-value – 1.21E-12

|         | Neonate  | Year 1   | Year 2   | Year 4 | Year 6 |
|---------|----------|----------|----------|--------|--------|
| Neonate |          |          |          |        |        |
| Year 1  | 0.02     |          |          |        |        |
| Year 2  | 5.28E-08 | 1.09E-03 |          |        |        |
| Year 4  | 0.08     | 0.96     | 4.91E-03 |        |        |
| Year 6  | 1.19E-04 | 0.05     | 0.36     | 0.08   |        |

**Supplemental Table S3.** Twin cohort pairwise t-test comparison P-value for motion scores. Overall ANOVA: Chi-square statistic – 37.01, DF –4, P-value 1.80E-05

|         | Singleton               |                  |              |          | Twin                    |                  |              |          |
|---------|-------------------------|------------------|--------------|----------|-------------------------|------------------|--------------|----------|
|         | Data from scan included | Pre-Prisma Visit | Prisma Visit | No Visit | Data from scan included | Pre-Prisma Visit | Prisma Visit | No Visit |
| Neonate | 181                     | 252              | 0            | 0        | 157                     | 182              | 0            | 0        |
| Year 1  | 111                     | 215              | 0            | 37       | 109                     | 133              | 0            | 49       |
| Year 2  | 70                      | 178              | 0            | 74       | 80                      | 113              | 0            | 69       |
| Year 4  | 92                      | 131              | 19           | 102      | 56                      | 67               | 8            | 107      |
| Year 6  | 90                      | 97               | 29           | 121      | 56                      | 61               | 20           | 99       |

**Supplemental Table S4. Subject retention through the study.** Imaging visits for singletons at 1 and 2 years are relatively reduced as the initial study of singletons was funded for neonatal imaging only; 1 and 2 year visits were developmental assessments only. Twins were recruited after the initial singletons were recruited. This analysis is focused on scans obtained before the Prisma scanner was installed at UNC. Many subjects were not lost to follow-up, but went on to have Prisma scans at older ages and are not included in this analysis.

|        |                       | N   | Mean (SD)      | % change to 6 yrs | P/T-Stat/DF      |
|--------|-----------------------|-----|----------------|-------------------|------------------|
| Year 0 | GM (mm <sup>3</sup> ) | 181 | 204109 (23081) | 212%              | 5.3E-57/83.23/52 |
|        | WM (mm <sup>3</sup> ) | 181 | 157198 (17681) | 104%              | 2.7E-47/53.87/52 |
| Year 1 | GM (mm <sup>3</sup> ) | 111 | 507701 (46420) | 25%               | 6.9E-33/28.35/51 |
|        | WM (mm <sup>3</sup> ) | 111 | 223255 (25097) | 43%               | 7.0E-35/31.18/51 |
|        | SA (mm <sup>2</sup> ) | 110 | 69166 (5449)   | 29%               | 4.2E-37/36.35/49 |
|        | CT (mm)               | 110 | 3.39 (0.13)    | -3.5%             | 2.8E-4/-3.91/49  |
| Year 2 | GM (mm <sup>3</sup> ) | 70  | 575139 (51062) | 11%               | 3.9E-15/12.60/38 |
|        | WM (mm <sup>3</sup> ) | 70  | 266444 (25364) | 20%               | 1.4E-18/16.12/38 |
|        | SA (mm <sup>2</sup> ) | 70  | 80313 (5661)   | 11%               | 8.6E-19/16.36/38 |
|        | CT (mm)               | 70  | 3.31 (0.09)    | -1.2%             | 0.01/2.89/38     |
| Year 4 | GM (mm <sup>3</sup> ) | 90  | 624951 (55689) | 1.8%              | 1.4E-6/5.40/57   |
|        | WM (mm <sup>3</sup> ) | 90  | 301907 (28733) | 6.1%              | 2.0E-20/14.23/57 |
|        | SA (mm <sup>2</sup> ) | 85  | 86802 (6036)   | 2.9%              | 5.1E-05/4.40/54  |
|        | CT (mm)               | 85  | 3.34 (0.17)    | -2%               | 0.04/-2.15/54    |
| Year 6 | GM (mm <sup>3</sup> ) | 90  | 636558 (58850) |                   |                  |
|        | WM (mm <sup>3</sup> ) | 90  | 320357 (30720) |                   |                  |
|        | SA (mm <sup>2</sup> ) | 88  | 89339 (6494)   |                   |                  |
|        | CT (mm)               | 88  | 3.27 (0.15)    |                   |                  |

**Supplemental Table S5.** Change in GM volume, WM volume, average CT and total surface area from respective age to age 6 years. Data including all values at age 6 and one previous age were used to fit a linear mixed effects model with each of the four different measures as the outcome (only GM and WM when neonate was previous age). Covariates included in the model were an indicator variable for age (year 6 or previous age), gender, scanner, and motion score. In addition, a subject level random intercept was included. Reported p-values, t-statistic, and degrees of freedom are for the coefficient for the age indicator variable, which tests the null hypothesis that there is no difference between age 6 and the previous year for the given brain volume measure.

|          | GM Slope  | WM Slope | P-Value   | Test statistic | N   |
|----------|-----------|----------|-----------|----------------|-----|
| Year 0,1 | 303729.84 | 66195.50 | 4.06E-239 | -83.79         | 217 |
| Year 1,2 | 68541.65  | 44291.60 | 5.38E-08  | -5.63          | 134 |
| Year 2,4 | 25744.56  | 18570.18 | 3.99E-03  | -2.91          | 126 |
| Year 4,6 | 6036.73   | 9458.67  | 0.13      | 1.50           | 120 |

**Supplemental Table S6.** Comparison of cortical GM and WM slopes in the singleton cohort. The test statistic and p-value are for the interaction between GM and WM slope using a linear mixed effects model controlling for age at scan, gender, scanner, gestational age at birth, and motion score with a random intercept for each subject.

**Supplemental Table S7.** Regional means of CT (separate large Excel file)

**Supplemental Table S8.** Regional means of SA (separate large Excel file)

**Supplemental Table S9.** Regional means of CT – r squared (separate large Excel file)

|        | All            |              | Male           |              | Female         |              |
|--------|----------------|--------------|----------------|--------------|----------------|--------------|
|        | r <sup>2</sup> | CI           | r <sup>2</sup> | CI           | r <sup>2</sup> | CI           |
| Year 1 | 0.93           | (0.89, 0.95) | 0.94           | (0.91, 0.96) | 0.90           | (0.86, 0.94) |
| Year 2 | 0.97           | (0.96, 0.98) | 0.97           | (0.95, 0.98) | 0.96           | (0.94, 0.98) |
| Year 4 | 0.99           | (0.99, 1.00) | 0.99           | (0.98, 0.99) | 0.99           | (0.98, 0.99) |

**Supplemental Table S10.** Singleton cohort R-squared for regional means of CT at given year predicting regional means at 6 from a linear model using the group mean in each of the 148 cortical regions at the previous age as predictors of the group mean in each region at age 6 years.

**Supplemental Table S11.** Regional means of SA– r squared (separate large Excel file)

|        |                       | Male |                | Female |                | Not Controlled     | Brain Size Controlled |
|--------|-----------------------|------|----------------|--------|----------------|--------------------|-----------------------|
|        |                       | N    | Mean (SD)      | N      | Mean (SD)      | P/T-Stat/DF        | P/T-Stat/DF           |
| Year 0 | GM (mm <sup>3</sup> ) | 87   | 210675 (24496) | 94     | 198032 (19963) | 1.20E-05/-4.51/176 | 0.95/0.07/175         |
|        | WM (mm <sup>3</sup> ) | 87   | 163190 (17695) | 94     | 151728 (15892) | 7.66E-07/-5.13/176 | 0.17/-1.37/175        |
| Year 1 | GM (mm <sup>3</sup> ) | 55   | 527235 (44022) | 56     | 488515 (40627) | 1.21E-05/-4.59/106 | 0.05/1.96/105         |
|        | WM (mm <sup>3</sup> ) | 55   | 234799 (24652) | 56     | 211917 (19973) | 3.2E-07/-5.46/106  | 0.49/-0.70/105        |
|        | SA (mm <sup>2</sup> ) | 55   | 71570 (5107)   | 55     | 66762 (4698)   | 2.5E-06/-4.99/105  | 0.59/-0.54/104        |
|        | CT (mm)               | 55   | 3.44 (0.13)    | 55     | 3.35 (0.13)    | 2.8E-03/-3.06/105  | 0.74/-0.34/104        |
| Year 2 | GM (mm <sup>3</sup> ) | 41   | 591034 (49033) | 29     | 552667 (45800) | 3.37E-03/-3.05/65  | 0.48/-0.71/64         |
|        | WM (mm <sup>3</sup> ) | 41   | 272946 (26990) | 29     | 257250 (19880) | 0.01/-2.52/65      | 0.83/0.22/64          |
|        | SA (mm <sup>2</sup> ) | 41   | 81986 (5654)   | 29     | 77947 (4839)   | 0.01/-2.90/65      | 0.94/-0.08/64         |
|        | CT (mm)               | 41   | 3.32 (0.08)    | 29     | 3.28 (0.09)    | 0.02/-2.40/65      | 0.80/-0.25/64         |
| Year 4 | GM (mm <sup>3</sup> ) | 40   | 653482 (52458) | 50     | 602126 (47397) | 2.38E-06/-5.06/85  | 0.27/1.11/84          |
|        | WM (mm <sup>3</sup> ) | 40   | 316358 (28286) | 50     | 290346 (23576) | 8.62E-07/-5.31/85  | 0.90/-0.13/84         |
|        | SA (mm <sup>2</sup> ) | 38   | 88812 (5928)   | 47     | 85176 (5676)   | 7.68E-04/-3.50/80  | 0.14/1.47/77          |
|        | CT (mm)               | 38   | 3.40 (0.16)    | 47     | 3.28 (0.15)    | 9.62E-04/-3.43/80  | 0.16/-1.41/77         |
| Year 6 | GM (mm <sup>3</sup> ) | 38   | 670875 (49460) | 52     | 611480 (52444) | 8.41E-07/-5.32/85  | 1/-0.01/84            |
|        | WM (mm <sup>3</sup> ) | 38   | 337501 (30392) | 52     | 307830 (24450) | 3.58E-06/-4.96/85  | 0.54/0.61/84          |
|        | SA (mm <sup>2</sup> ) | 38   | 92663 (6500)   | 50     | 86813 (5281)   | 2.41E-05/-4.47/83  | 0.11/1.62/82          |
|        | CT (mm)               | 38   | 3.31 (0.15)    | 50     | 3.23 (0.14)    | 1.40E-05/-4.62/83  | 0.12/-1.59/82         |

**Supplemental Table S12.** Sex differences in cortical GM, WM, total SA and average CT (mean (SD)) at each age in singleton cohort. Test statistic is based on a linear model with scanner, age at scan, motion score; coefficient for gender is reported. For CT, the cube root of cortical GM plus WM was used to control for overall brain size. For SA, the sum of cortical GM and WM was used to control for overall brain size.

|          |    | Male Slope | Female Slope | P-Value  | Test Statistic | N   |
|----------|----|------------|--------------|----------|----------------|-----|
| Year 0,1 | WM | 70378      | 59364        | 1.95E-03 | -3.22          | 217 |
|          | GM | 316569     | 290513       | 5.66E-05 | -4.28          | 217 |
| Year 1,2 | WM | 41643      | 45286        | 0.30     | 1.05           | 134 |
|          | GM | 70173      | 66370        | 0.40     | -0.85          | 134 |
|          | SA | 10930      | 11098        | 0.76     | 0.30           | 133 |
|          | CT | -0.09      | -0.06        | 0.13     | 1.54           | 133 |
| Year 2,4 | WM | 18089      | 16720        | 0.56     | -0.59          | 126 |
|          | GM | 29262      | 23927        | 0.10     | -1.72          | 126 |
|          | SA | 6463       | 7029         | 0.42     | 0.83           | 123 |
|          | CT | 0.09       | 0.04         | 0.09     | -1.78          | 123 |
| Year 4,6 | WM | 10232      | 9222         | 0.39     | -0.87          | 120 |
|          | GM | 7452       | 5052         | 0.20     | -1.30          | 120 |
|          | SA | 2207       | 1908         | 0.72     | -0.36          | 116 |
|          | CT | -0.03      | -0.03        | 0.78     | -0.28          | 116 |

**Supplemental Table S13.** Singleton cohort sex differences in growth trajectories of cortical GM, WM, SA and CT. The interaction between genders and age using a linear mixed effects model controlling for age at scan, scanner, gestational age at birth, and motion score with a random intercept for each subject is presented.



|        |    | Female |              |    | Male  |              |    |
|--------|----|--------|--------------|----|-------|--------------|----|
|        |    | $r^2$  | CI           | N  | $r^2$ | CI           | N  |
| Year 0 | WM | 0.36   | (0.00, 0.83) | 31 | 0.33  | (0.00, 0.99) | 21 |
|        | GM | 0.60   | (0.33, 0.86) | 31 | 0.53  | (0.01, 1.00) | 21 |
| Year 1 | WM | 0.74   | (0.41, 0.95) | 26 | 0.47  | (0.04, 0.89) | 25 |
|        | GM | 0.96   | (0.88, 0.99) | 26 | 0.74  | (0.31, 0.94) | 25 |
|        | SA | 0.92   | (0.70, 0.99) | 24 | 0.77  | (0.42, 0.95) | 25 |
|        | CT | 0.21   | (0.00, 0.78) | 24 | 0.26  | (0.01, 0.80) | 25 |
| Year 2 | WM | 0.58   | (0.00, 1.00) | 18 | 0.60  | (0.07, 0.96) | 22 |
|        | GM | 0.74   | (0.00, 1.00) | 18 | 0.88  | (0.46, 0.99) | 22 |
|        | SA | 0.90   | (0.00, 1.00) | 18 | 0.95  | (0.79, 1.00) | 22 |
|        | CT | 0.63   | (0.00, 1.00) | 18 | 0.38  | (0.00, 0.93) | 22 |
| Year 4 | WM | 0.79   | (0.49, 0.95) | 32 | 0.79  | (0.41, 0.98) | 23 |
|        | GM | 0.86   | (0.55, 0.97) | 32 | 0.65  | (0.15, 0.95) | 23 |
|        | SA | 0.82   | (0.49, 0.98) | 30 | 0.34  | (0.01, 0.94) | 22 |
|        | CT | 0.19   | (0.01, 0.67) | 30 | 0.03  | (0.00, 0.68) | 22 |

**Supplemental Table S14.** Variance in cortical structure at age 6 accounted for by earlier ages in singleton females and males. Separate models predicted cortical GM, WM, CT, and SA for neonate, 1, 2, and 4 year scans using motion, scanner and age at scan in days as covariates. The residuals from these models were then used in a linear model to predict cortical GM and WM at age 6. Covariates in these models were birthweight, gestational age at birth, gender, mother's education (in years), height at six, weight at six, scanner for the age six scan, age in days for the age six scan, and motion score for the age six scan. A confidence interval for the partial r-squared was determined from 1,000 bootstrap samples using the percentile method.

|                | N   | Birthweight |        |          | Gest Age @ Birth |        |          | Maternal Education |        |         |
|----------------|-----|-------------|--------|----------|------------------|--------|----------|--------------------|--------|---------|
|                |     | Coef        | T-stat | P value  | Coef             | T-stat | P value  | Coef               | T-stat | P value |
| <b>Neonate</b> | 181 |             |        |          |                  |        |          |                    |        |         |
| GM             |     | 23.01       | 7.82   | 2.66E-11 | 644.28           | 3.81   | 3.52E-03 | -403.9             | -1.04  | 0.37    |
| WM             |     | 16.11       | 6.45   | 2.94E-08 | 350.15           | 2.44   | 0.05     | 32.75              | 0.10   | 0.96    |
| <b>1 year</b>  | 111 |             |        |          |                  |        |          |                    |        |         |
| GM             |     | 33.86       | 3.00   | 0.02     | -614.01          | -0.92  | 0.42     | 2617.06            | 1.78   | 0.14    |
| WM             |     | 21.08       | 3.72   | 4.16E-03 | -370.41          | -1.10  | 0.35     | 1840.95            | 2.50   | 0.05    |
| <b>2 year</b>  | 70  |             |        |          |                  |        |          |                    |        |         |
| GM             |     | 39.46       | 2.47   | 0.05     | -1282.35         | -1.39  | 0.25     | 2444.85            | 0.99   | 0.39    |
| WM             |     | 19.09       | 2.53   | 0.05     | -930.40          | -2.14  | 0.09     | 1819.96            | 1.56   | 0.20    |
| <b>4 year</b>  | 89  |             |        |          |                  |        |          |                    |        |         |
| GM             |     | 52.98       | 3.70   | 4.16E-03 | -1622.74         | -1.94  | 0.11     | 3014.02            | 1.39   | 0.25    |
| WM             |     | 26.25       | 3.51   | 0.01     | -834.94          | -1.91  | 0.12     | 1519.6             | 1.34   | 0.26    |
| <b>6 year</b>  | 89  |             |        |          |                  |        |          |                    |        |         |
| GM             |     | 53.73       | 3.22   | 0.01     | -470.18          | -0.49  | 0.67     | 4645.83            | 2.04   | 0.10    |
| WM             |     | 24.85       | 2.91   | 0.02     | -627.18          | -1.28  | 0.28     | 3079.96            | 2.63   | 0.04    |

**Supplemental Table S15. Relationship of birthweight, gestational age at birth, and maternal education with cortical GM and WM volumes in singleton cohort.** The model included each variable, with age at scan, scanner and motion as controls. P values were FDR corrected for analysis of GM and WM volume, average CT and total SA.

|               | N   | Birthweight |        |         | Gest Age @ Birth |        |         | Maternal Education |        |         |
|---------------|-----|-------------|--------|---------|------------------|--------|---------|--------------------|--------|---------|
|               |     | Coef        | T-stat | P value | Coef             | T-stat | P value | Coef               | T-stat | P value |
| <b>1 year</b> | 110 |             |        |         |                  |        |         |                    |        |         |
| CT            |     | 3.66E-05    | 1.09   | 0.35    | -2.15E-03        | -1.09  | 0.35    | 9.50E-03           | 2.18   | 0.08    |
| SA            |     | 3.86        | 2.95   | 0.02    | -47.73           | -0.62  | 0.59    | 360.53             | 2.12   | 0.09    |
| <b>2 year</b> | 70  |             |        |         |                  |        |         |                    |        |         |
| CT            |     | 7.23E-05    | 2.82   | 0.03    | -2.92E-03        | -1.98  | 0.11    | 6.69E-03           | 1.69   | 0.16    |
| SA            |     | 4.13        | 2.32   | 0.06    | -122.05          | -1.19  | 0.32    | 213.99             | 0.78   | 0.51    |
| <b>4 year</b> | 84  |             |        |         |                  |        |         |                    |        |         |
| CT            |     | 9.26E-05    | 2.49   | 0.05    | 1.16E-04         | 0.06   | 0.97    | 9.93E-04           | 0.19   | 0.90    |
| SA            |     | 3.91        | 2.34   | 0.06    | -127.93          | -1.37  | 0.26    | 400.79             | 1.69   | 0.16    |
| <b>6 year</b> | 87  |             |        |         |                  |        |         |                    |        |         |
| CT            |     | 6.11E-05    | 1.90   | 0.12    | 2.61E-05         | 0.01   | 0.99    | 8.14E-03           | 1.86   | 0.12    |
| SA            |     | 5.51        | 2.95   | 0.02    | -73.57           | -0.68  | 0.56    | 421.86             | 1.65   | 0.17    |

**Supplemental Table S16. Relationship of birthweight, gestational age at birth, and maternal education with average CT and total SA in singleton cohort.** The model included each variable, with age at scan, scanner and motion as controls. P values were FDR corrected for analysis of GM and WM volume, average CT and total SA.

|                | N   | Birthweight |        |         | Gest Age @ Birth |        |         | Maternal Education |        |         |
|----------------|-----|-------------|--------|---------|------------------|--------|---------|--------------------|--------|---------|
|                |     | Coef        | T-stat | P value | Coef             | T-stat | P value | Coef               | T-stat | P value |
| <b>Neonate</b> | 181 |             |        |         |                  |        |         |                    |        |         |
| <b>GM</b>      |     | 3.29        | 2.03   | 0.50    | 231.09           | 2.80   | 0.31    | -384.40            | -2.08  | 0.50    |
| <b>WM</b>      |     | -1.70       | -0.71  | 0.86    | 0.02             | 0.00   | 1.00    | 49.28              | 0.31   | 0.90    |
| <b>1 year</b>  | 111 |             |        |         |                  |        |         |                    |        |         |
| <b>GM</b>      |     | -7.62       | -1.85  | 0.50    | 234.39           | 1.02   | 0.76    | -567.56            | -1.11  | 0.76    |
| <b>WM</b>      |     | 1.37        | 0.50   | 0.84    | 32.80            | 0.21   | 0.95    | 327.46             | 0.95   | 0.76    |
| <b>2 year</b>  | 70  |             |        |         |                  |        |         |                    |        |         |
| <b>GM</b>      |     | 4.98        | 1.00   | 0.76    | 500.57           | 1.76   | 0.50    | -1476.23           | -1.95  | 0.50    |
| <b>WM</b>      |     | 4.11        | 1.09   | 0.76    | -155.78          | -0.72  | 0.81    | 116.36             | 0.20   | 0.95    |
| <b>4 year</b>  | 89  |             |        |         |                  |        |         |                    |        |         |
| <b>GM</b>      |     | -1.57       | -0.38  | 0.88    | 19.09            | 0.08   | 0.99    | -348.86            | -0.59  | 0.83    |
| <b>WM</b>      |     | -1.60       | -0.57  | 0.83    | 3.29             | 0.02   | 1.00    | -197.32            | -0.50  | 0.84    |
| <b>6 year</b>  | 89  |             |        |         |                  |        |         |                    |        |         |
| <b>GM</b>      |     | -0.69       | -0.14  | 0.98    | 594.84           | 2.17   | 0.50    | -959.06            | -1.42  | 0.61    |
| <b>WM</b>      |     | -2.41       | -0.76  | 0.81    | -93.73           | -0.55  | 0.83    | 265.53             | 0.63   | 0.83    |

**Supplemental Table S17. Relationship of birthweight, gestational age at birth, and maternal education with GM and WM in the singleton cohort controlling for ICV at each age.** The model included each variable, with age at scan, scanner and motion as controls. P values were FDR corrected for analysis of GM and WM volume, average CT and total SA.

|               | N   | Birthweight |        |         | Gest Age @ Birth |        |         | Maternal Education |        |         |
|---------------|-----|-------------|--------|---------|------------------|--------|---------|--------------------|--------|---------|
|               |     | Coef        | T-stat | P value | Coef             | T-stat | P value | Coef               | T-stat | P value |
| <b>1 year</b> | 110 |             |        |         |                  |        |         |                    |        |         |
| CT            |     | -3.08E-05   | -0.99  | 0.76    | -7.69E-04        | -0.45  | 0.86    | 4.32E-03           | 1.12   | 0.76    |
| SA            |     | -0.86       | -1.51  | 0.60    | 49.33            | 1.56   | 0.59    | -3.29              | -0.05  | 1.00    |
| <b>2 year</b> | 70  |             |        |         |                  |        |         |                    |        |         |
| CT            |     | 3.17E-05    | 1.66   | 0.55    | -8.26E-04        | -0.76  | 0.81    | 2.07E-03           | 0.71   | 0.81    |
| SA            |     | 0.40        | 0.57   | 0.83    | 70.97            | 1.77   | 0.50    | -210.52            | -1.98  | 0.50    |
| <b>4 year</b> | 84  |             |        |         |                  |        |         |                    |        |         |
| CT            |     | 5.20E-05    | 1.46   | 0.61    | 1.46E-03         | 0.77   | 0.81    | -3.24E-03          | -0.68  | 0.81    |
| SA            |     | -0.74       | -1.03  | 0.76    | 29.53            | 0.77   | 0.81    | 93.68              | 0.97   | 0.76    |
| <b>6 year</b> | 87  |             |        |         |                  |        |         |                    |        |         |
| CT            |     | 2.75E-06    | 0.10   | 0.99    | 1.42E-03         | 0.91   | 0.76    | 1.40E-03           | 0.37   | 0.88    |
| SA            |     | 0.30        | 0.29   | 0.90    | 50.97            | 0.91   | 0.76    | -180.29            | -1.32  | 0.68    |

**Supplemental Table S18. Relationship of birthweight, gestational age at birth, and maternal education with CT and SA in the singleton cohort controlling for ICV at each age.** The model included each variable, with age at scan, scanner and motion as controls. P values were FDR corrected for analysis of GM and WM volume, average CT and total SA.

|                | N  | Birthweight |        |          | Gest Age @ Birth |        |         | Maternal Education |        |         |
|----------------|----|-------------|--------|----------|------------------|--------|---------|--------------------|--------|---------|
|                |    | Coef        | T-stat | P value  | Coef             | T-stat | P value | Coef               | T-stat | P value |
| <b>Neonate</b> | 92 |             |        |          |                  |        |         |                    |        |         |
| <b>GM</b>      |    | 23.16       | 4.35   | 3.85E-05 | 549.95           | 2.43   | 0.02    | -525.16            | -1.07  | 0.29    |
| <b>WM</b>      |    | 15.00       | 3.20   | 1.91E-03 | 304.94           | 1.53   | 0.13    | -28.48             | -0.07  | 0.95    |
| <b>1 year</b>  | 65 |             |        |          |                  |        |         |                    |        |         |
| <b>GM</b>      |    | 6.62        | 0.47   | 0.64     | -1600.67         | -1.94  | 0.06    | 3596.35            | 2.07   | 0.04    |
| <b>WM</b>      |    | 4.98        | 0.71   | 0.48     | -669.40          | -1.61  | 0.11    | 2128.93            | 2.44   | 0.02    |
| <b>2 year</b>  | 43 |             |        |          |                  |        |         |                    |        |         |
| <b>GM</b>      |    | 65.89       | 2.61   | 0.01     | -2501.89         | -1.92  | 0.06    | 6023.12            | 1.57   | 0.13    |
| <b>WM</b>      |    | 36.11       | 3.46   | 1.44E-03 | -1493.50         | -2.78  | 0.01    | 3921.19            | 2.46   | 0.02    |
| <b>4 year</b>  | 80 |             |        |          |                  |        |         |                    |        |         |
| <b>GM</b>      |    | 51.48       | 3.47   | 8.95E-04 | -1678.13         | -1.86  | 0.07    | 4576.64            | 1.89   | 0.06    |
| <b>WM</b>      |    | 24.18       | 3.16   | 2.32E-03 | -690.40          | -1.48  | 0.14    | 2095.85            | 1.68   | 0.10    |
| <b>6 year</b>  | 85 |             |        |          |                  |        |         |                    |        |         |
| <b>GM</b>      |    | 54.98       | 3.16   | 2.24E-03 | -528.60          | -0.53  | 0.60    | 4717.60            | 1.96   | 0.05    |
| <b>WM</b>      |    | 25.04       | 2.82   | 0.01     | -637.28          | -1.24  | 0.22    | 3285.12            | 2.67   | 0.01    |

**Supplemental Table S19. Relationship of birthweight, gestational age at birth, and maternal education with GM and WM in the singleton cohort controlling for height at each age.** The model included each variable, with age at scan, scanner and motion as controls. P values were FDR corrected for analysis of GM and WM volume, average CT and total SA.

|               | N  | Birthweight |        |         | Gest Age @ Birth |        |         | Maternal Education |        |         |
|---------------|----|-------------|--------|---------|------------------|--------|---------|--------------------|--------|---------|
|               |    | Coef        | T-stat | P value | Coef             | T-stat | P value | Coef               | T-stat | P value |
| <b>1 year</b> | 64 |             |        |         |                  |        |         |                    |        |         |
| CT            |    | -1.14E-05   | -0.25  | 0.80    | -2.02E-03        | -0.77  | 0.45    | 1.18E-02           | 2.12   | 0.04    |
| SA            |    | 0.63        | 0.42   | 0.67    | -157.22          | -1.78  | 0.08    | 413.65             | 2.24   | 0.03    |
| <b>2 year</b> | 43 |             |        |         |                  |        |         |                    |        |         |
| CT            |    | 1.07E-04    | 2.61   | 0.01    | -4.50E-03        | -2.13  | 0.04    | 1.26E-02           | 2.01   | 0.05    |
| SA            |    | 7.53        | 2.89   | 0.01    | -241.14          | -1.80  | 0.08    | 645.73             | 1.63   | 0.11    |
| <b>4 year</b> | 76 |             |        |         |                  |        |         |                    |        |         |
| CT            |    | 9.24E-05    | 2.54   | 0.01    | 1.03E-04         | 0.05   | 0.96    | 2.16E-03           | 0.38   | 0.71    |
| SA            |    | 4.09        | 2.43   | 0.02    | -159.78          | -1.62  | 0.11    | 599.20             | 2.27   | 0.03    |
| <b>6 year</b> | 83 |             |        |         |                  |        |         |                    |        |         |
| CT            |    | 6.38E-05    | 1.94   | 0.06    | -3.90E-04        | -0.20  | 0.84    | 8.86E-03           | 1.95   | 0.05    |
| SA            |    | 5.50        | 2.84   | 0.01    | -67.17           | -0.59  | 0.56    | 403.16             | 1.50   | 0.14    |

**Supplemental Table S20. Relationship of birthweight, gestational age at birth, and maternal education with CT and SA in the singleton cohort controlling for height at each age.** The model included each variable, with age at scan, scanner and motion as controls. P values were FDR corrected for analysis of GM and WM volume, average CT and total SA.

|        |         | GM (mm <sup>2</sup> ) | WM (mm <sup>3</sup> ) | N   | Total SA (mm <sup>2</sup> ) | Mean CT (mm) | N   |
|--------|---------|-----------------------|-----------------------|-----|-----------------------------|--------------|-----|
| Year 0 | All     | 198449 (24120)        | 154747 (18851)        | 157 |                             |              |     |
|        | Males   | 201087 (22056)        | 157339 (16570)        | 86  |                             |              |     |
|        | Females | 195254 (26209)        | 151606 (20982)        | 71  |                             |              |     |
|        | P-value | 5.59E-04              | 1.27E-04              |     |                             |              |     |
|        | T-Stat  | -3.53                 | -3.93                 |     |                             |              |     |
|        | DF      | 152                   | 152                   |     |                             |              |     |
| Year 1 | All     | 504089 (46359)        | 227124 (25845)        | 108 | 68455 (5437)                | 3.40 (0.12)  | 106 |
|        | Males   | 523618 (42188)        | 238125 (23848)        | 57  | 70567 (5102)                | 3.43 (0.10)  | 56  |
|        | Females | 482263 (41049)        | 214830 (22369)        | 51  | 66088 (4827)                | 3.37 (0.12)  | 50  |
|        | P-value | 4.30E-06              | 1.58E-06              |     | 0.48                        | 0.22         |     |
|        | T-Stat  | -4.86                 | -5.10                 |     | 0.72                        | -1.25        |     |
|        | DF      | 103                   | 103                   |     | 99                          | 99           |     |
| Year 2 | All     | 564260 (50199)        | 264017 (28673)        | 80  | 78755 (5976)                | 3.28 (0.10)  | 79  |
|        | Males   | 582930 (40594)        | 271965 (26060)        | 43  | 80616 (5048)                | 3.30 (0.10)  | 43  |
|        | Females | 542561 (52030)        | 254781 (29131)        | 37  | 76532 (6299)                | 3.25 (0.10)  | 36  |
|        | P-value | 6.09E-04              | 0.02                  |     | 0.23                        | 0.27         |     |
|        | T-Stat  | -3.58                 | -2.35                 |     | 1.20                        | -1.12        |     |
|        | DF      | 75                    | 75                    |     | 73                          | 73           |     |
| Year 4 | All     | 632399 (53774)        | 309541 (27999)        | 56  | 87984 (5940)                | 3.29 (0.12)  | 55  |
|        | Males   | 651250 (47692)        | 317397 (24789)        | 33  | 89953 (5305)                | 3.30 (0.13)  | 32  |
|        | Females | 605351 (51213)        | 298270 (28995)        | 23  | 85244 (5785)                | 3.27 (0.11)  | 23  |
|        | P-value | 1.31E-03              | 0.01                  |     | 0.81                        | 0.97         |     |
|        | T-Stat  | -3.40                 | -2.52                 |     | -0.24                       | 0.04         |     |
|        | DF      | 51                    | 51                    |     | 49                          | 49           |     |
| Year 6 | All     | 627908 (60109)        | 320701 (34237)        | 56  | 89178 (6982)                | 3.23 (0.11)  | 55  |
|        | Males   | 649463 (54877)        | 330332 (31351)        | 29  | 91912 (6751)                | 3.24 (0.10)  | 29  |
|        | Females | 604756 (57665)        | 310356 (34736)        | 27  | 86129 (5994)                | 3.22 (0.12)  | 26  |
|        | P-value | 0.01                  | 0.04                  |     | 0.10                        | 0.70         |     |
|        | T-Stat  | -2.80                 | -2.07                 |     | -1.66                       | 0.39         |     |
|        | DF      | 51                    | 51                    |     | 49                          | 49           |     |

**Supplemental Table S21.** Twin cohort mean (SD) for WM, GM, SA and CT at given age for all, males and females. Test statistic based on linear model with scanner, age at scan, motion score; coefficient for gender is reported. For cortical thickness (CT), the cube root of cortical GM plus WM was used to control for overall brain size. For surface area (SA) the sum of cortical GM and WM was used to control for overall brain size.

**Supplemental Table S22.** Regional means of CT for Twins

**Supplemental Table S23.** Regional means of SA for Twins

**Supplemental Table S24.** Abbreviations for cortical regions (separate large Excel file)

|        |    | Singletons |              |    | Twins |              |    |
|--------|----|------------|--------------|----|-------|--------------|----|
|        |    | $r^2$      | CI           | N  | $r^2$ | CI           | N  |
| Year 0 | WM | 0.50       | (0.14, 0.79) | 36 | 0.29  | (0.08, 0.62) | 42 |
|        | GM | 0.54       | (0.17, 0.79) | 36 | 0.43  | (0.22, 0.70) | 42 |
| Year 1 | WM | 0.63       | (0.30, 0.87) | 35 | 0.60  | (0.38, 0.76) | 46 |
|        | GM | 0.86       | (0.72, 0.94) | 35 | 0.84  | (0.71, 0.94) | 46 |
|        | SA | 0.86       | (0.73, 0.94) | 35 | 0.74  | (0.52, 0.90) | 44 |
|        | CT | 0.02       | (0.00, 0.35) | 35 | 0.37  | (0.05, 0.76) | 44 |
| Year 2 | WM | 0.69       | (0.34, 0.92) | 29 | 0.68  | (0.43, 0.86) | 37 |
|        | GM | 0.86       | (0.61, 0.97) | 29 | 0.86  | (0.68, 0.94) | 37 |
|        | SA | 0.93       | (0.85, 0.99) | 29 | 0.78  | (0.51, 0.91) | 35 |
|        | CT | 0.39       | (0.01, 0.79) | 29 | 0.61  | (0.25, 0.88) | 35 |
| Year 4 | WM | 0.83       | (0.60, 0.95) | 41 | 0.94  | (0.86, 0.98) | 30 |
|        | GM | 0.84       | (0.65, 0.96) | 41 | 0.93  | (0.78, 0.98) | 30 |
|        | SA | 0.61       | (0.32, 0.91) | 41 | 0.92  | (0.75, 0.98) | 28 |
|        | CT | 0.00       | (0.00, 0.18) | 41 | 0.57  | (0.18, 0.86) | 28 |

**Supplemental Table S25.** Partial  $r$  squared values from model with subjects with minor bleeds on neonatal MRI excluded.



|        |    | Twins 33 week gest age cutoff |              |    | Twins 37 week gest age cutoff |              |    |
|--------|----|-------------------------------|--------------|----|-------------------------------|--------------|----|
|        |    | $r^2$                         | CI           | N  | $r^2$                         | CI           | N  |
| Year 0 | WM | 0.27                          | (0.05, 0.58) | 45 | 0.53                          | (0.01, 1.00) | 21 |
|        | GM | 0.45                          | (0.22, 0.69) | 45 | 0.64                          | (0.01, 1.00) | 21 |
| Year 1 | WM | 0.61                          | (0.41, 0.77) | 48 | 0.69                          | (0.05, 1.00) | 22 |
|        | GM | 0.81                          | (0.64, 0.93) | 48 | 0.92                          | (0.69, 1.00) | 22 |
|        | SA | 0.73                          | (0.52, 0.88) | 46 | 0.68                          | (0.03, 1.00) | 22 |
|        | CT | 0.37                          | (0.08, 0.76) | 46 | 0.45                          | (0.01, 1.00) | 22 |
| Year 2 | WM | 0.7                           | (0.49, 0.87) | 40 | 0.79                          | (0.00, 1.00) | 17 |
|        | GM | 0.83                          | (0.65, 0.93) | 40 | 0.93                          | (0.00, 1.00) | 17 |
|        | SA | 0.78                          | (0.53, 0.90) | 38 | 0.78                          | (0.00, 1.00) | 17 |
|        | CT | 0.59                          | (0.31, 0.85) | 38 | 0.72                          | (0.00, 1.00) | 17 |
| Year 4 | WM | 0.93                          | (0.85, 0.98) | 32 | 0.96                          | (0.00, 1.00) | 15 |
|        | GM | 0.97                          | (0.93, 0.99) | 32 | 0.84                          | (0.00, 1.00) | 15 |
|        | SA | 0.93                          | (0.85, 0.98) | 30 | 0.88                          | (0.00, 1.00) | 15 |
|        | CT | 0.55                          | (0.20, 0.86) | 30 | 0.62                          | (0.00, 1.00) | 15 |

**Supplemental Table S26.** Partial  $r$  squared values comparing 37 and 33 week gestational age at birth exclusions for twins. While  $r^2$  values are similar, confidence intervals are not as informative in the less than 37 week group due to smaller sample size.

|        |    | Singletons     |              |    | Twins          |              |    |
|--------|----|----------------|--------------|----|----------------|--------------|----|
|        |    | r <sup>2</sup> | CI           | N  | r <sup>2</sup> | CI           | N  |
| Year 0 | WM | 0.21           | (0.00, 1.00) | 19 | 0.61           | (0.19, 0.86) | 27 |
|        | GM | 0.59           | (0.00, 1.00) | 19 | 0.37           | (0.02, 0.77) | 27 |
| Year 1 | WM | 0.42           | (0.06, 0.88) | 26 | 0.78           | (0.45, 0.96) | 24 |
|        | GM | 0.81           | (0.52, 0.95) | 26 | 0.92           | (0.71, 0.98) | 24 |
|        | SA | 0.81           | (0.47, 0.96) | 25 | 0.86           | (0.56, 0.99) | 24 |
|        | CT | 0.39           | (0.02, 0.84) | 25 | 0.41           | (0.00, 0.89) | 24 |
| Year 2 | WM | 0.69           | (0.26, 0.93) | 26 | 0.77           | (0.41, 0.96) | 26 |
|        | GM | 0.78           | (0.43, 0.95) | 26 | 0.91           | (0.75, 0.98) | 26 |
|        | SA | 0.87           | (0.66, 0.96) | 26 | 0.91           | (0.75, 0.98) | 25 |
|        | CT | 0.19           | (0.00, 0.74) | 26 | 0.71           | (0.23, 0.93) | 25 |
| Year 4 | WM | 0.92           | (0.65, 0.99) | 24 | 0.93           | (0.00, 1.00) | 15 |
|        | GM | 0.97           | (0.78, 1.00) | 24 | 0.71           | (0.00, 1.00) | 15 |
|        | SA | 0.92           | (0.54, 0.99) | 23 | 0.56           | (0.00, 1.00) | 15 |
|        | CT | 0.04           | (0.00, 0.88) | 23 | 0.80           | (0.00, 1.00) | 15 |

**Supplemental Table S27.** Partial r squared values in only subjects with an average motion score less than or equal to 2.5.

|        | GM       | WM   | CT       | SA   |
|--------|----------|------|----------|------|
| Neo    | 8.83E-09 | 0.34 | -        | -    |
| Year 1 | 0.84     | 0.20 | 0.35     | 0.77 |
| Year 2 | 0.34     | 0.84 | 0.12     | 0.64 |
| Year 4 | 0.33     | 0.08 | 1.83E-04 | 0.20 |
| Year 6 | 0.84     | 0.27 | 8.83E-09 | 0.27 |

**Supplemental Table S28.** FDR corrected p-values for differences in GM volume, WM volume, average CT, and total SA between Allegra and Trio scanners controlling for gender, gestational age at birth, birthweight, mother's education, and age at scan.

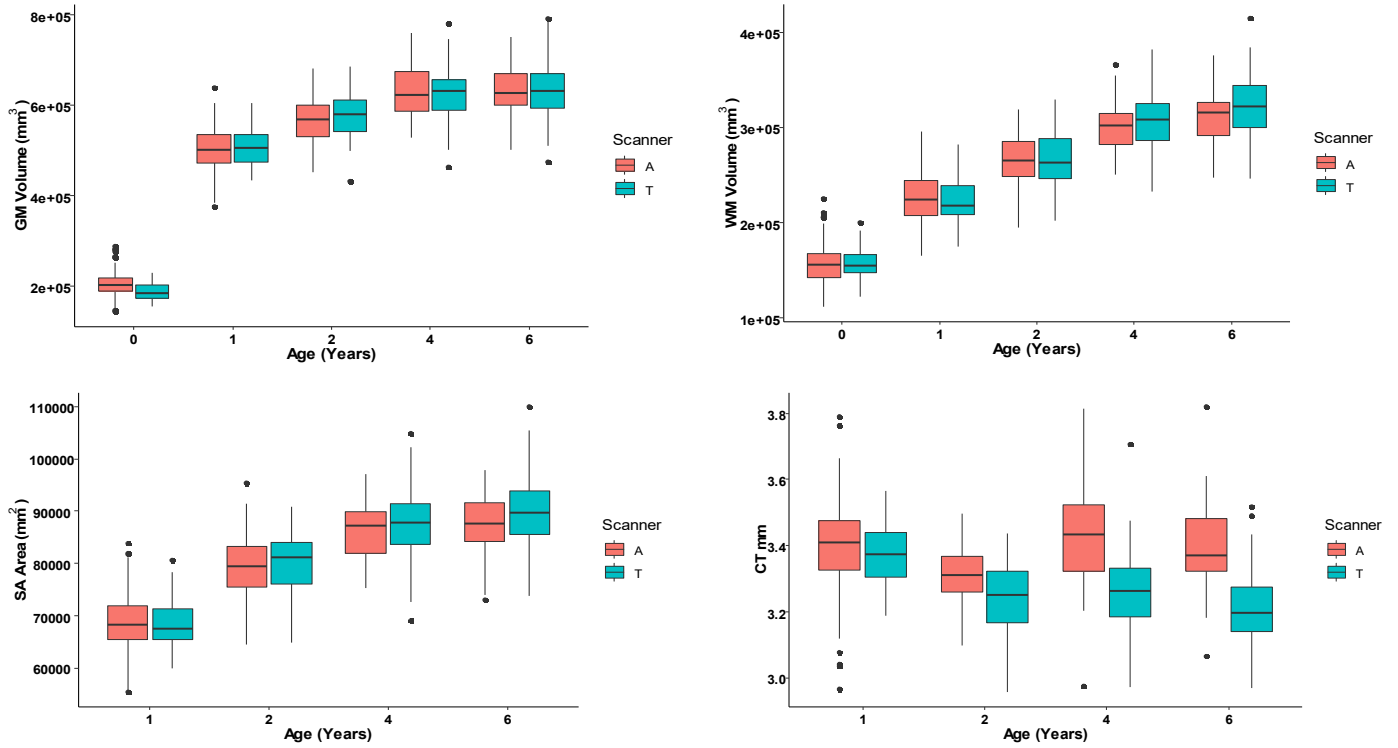

**Supplemental Figure S2.** Mean GM volume, WM volume, average CT, and total SA in subjects scanned on Allegra and Trio scanners controlling for gender, gestational age at birth, birthweight, mother's education, and age at scan.
